# Supplementary material for: Acylhydrazone as a novel “Off–On–Off” fluorescence probe for the sequential detection of Al3+and F−
Source: Royal Society of Chemistry journal article supplement (doi:10.1039/c8nj02474j), 2018-01-01
Supplement: c8nj02474j1.pdf [file c8nj02474j1.pdf]

### General information and materials

All solvents and starting materials were purchased from commercial sources and used without further purification. Salicylaldehyde was purchased from Energy Chemicals Shanghai China. Deionized water was used throughout the experimental work. The salts used as metal ions sources were  $\text{AlCl}_3 \cdot 6\text{H}_2\text{O}$ ,  $\text{PbCl}_2$ ,  $\text{Hg}(\text{OAc})_2$ ,  $\text{Cd}(\text{OAc})_2 \cdot 2\text{H}_2\text{O}$ ,  $\text{LiCl}$ ,  $\text{NaCl}$ ,  $\text{KCl}$ ,  $\text{ZnCl}_2$ ,  $\text{MgCl}_2$ ,  $\text{CaCl}_2$ ,  $\text{CuCl}_2$ ,  $\text{NiCl}_2 \cdot 6\text{H}_2\text{O}$ ,  $\text{CoCl}_2 \cdot 6\text{H}_2\text{O}$ ,  $\text{FeCl}_3 \cdot 6\text{H}_2\text{O}$ ,  $\text{AgNO}_3$ ,  $\text{FeCl}_2$ ,  $\text{CrCl}_3$ ,  $\text{MnCl}_2$ ,  $\text{GaCl}_3$  and  $\text{InCl}_3$ . The salts used as anion ions sources were  $\text{KF}$ ,  $\text{KBr}$ ,  $\text{KClO}_4$ ,  $\text{NH}_4\text{CN}$ ,  $\text{KH}_2\text{PO}_4$ ,  $\text{KHSO}_4$ ,  $\text{KI}$ ,  $\text{KNO}_3$ ,  $\text{KOAc}$ ,  $\text{KPF}_6$ ,  $\text{K}_2\text{SO}_4$ ,  $\text{KCl}$ ,  $\text{K}_3\text{PO}_4$ , and  $\text{AlF}_3$ .

### Synthesis and characterization

**Methyl 4-(pyridin-4-yl)benzoate:** 4-(Pyridin-4-yl)benzoic acid (4.0 g, 20 mmol) was suspended in methanol (200 mL), concentrated sulfuric acid (5 mL) was added at room temperature, and the mixture was heated under reflux for 8 h. After completion of the reaction, the solvent was removed under vacuum, and water (100 mL) was added to the residue to precipitate it. The solid was filtered and further washed with water (50 mL  $\times$  3), the obtained solid was dried in air to a stable mass in 96% yield.  $^1\text{H}$  NMR (400 MHz,  $\text{DMSO}-d_6$ )  $\delta$  8.68 (dd,  $J = 4.5, 1.6$  Hz, 2H), 8.08 (d,  $J = 8.5$  Hz, 2H), 7.97 (d,  $J = 8.5$  Hz, 2H), 7.78 (dd,  $J = 4.5, 1.6$  Hz, 2H), 3.89 (s, 3H).

**4-(Pyridin-4-yl)benzohydrazide (PBH):** Methyl 4-(pyridin-4-yl)benzoate (2.10 g, 10 mmol) was dissolved in methanol (30 mL), hydrazine hydrate (5 mL) was added at room temperature, and the mixture was heated under reflux overnight. After completion of the reaction, the solvent was removed under vacuum, and water (50 mL) was added to the residue to precipitate it. The solid was filtered and further washed with water (20 mL  $\times$  3), the obtained solid was dried in air to a stable mass in 90% yield.  $^1\text{H}$  NMR (400 MHz,  $\text{DMSO}-d_6$ )  $\delta$  9.90 (s, 1H), 8.65 (d,  $J = 5.1$  Hz, 2H), 7.96 (d,  $J = 8.2$  Hz, 2H), 7.89 (d,  $J = 8.1$  Hz, 2H), 7.76 (d,  $J = 5.1$  Hz, 2H), 4.55 (s, 2H).

***N'*-(2-hydroxybenzylidene)-4-(pyridin-4-yl)benzohydrazide (SPBH):** A mixture of **PBH** (213 mg, 1 mmol) and salicylaldehyde (122 mg, 1 mmol) in 10 mL of ethanol was mixed in a flask and then it was stirred at 50°C for 6 h. When the reaction was completed (checked by TLC), the solvent was removed under vacuum. The solid obtained was suspended and shaken in ether, filtered and further washed with ether. It was recrystallized from *n*-hexane  $\text{CH}_2\text{Cl}_2$  and dried in air to a stable mass. White flaky solid in 80% yield.  $^1\text{H}$  NMR (400 MHz,  $\text{DMSO}-d_6$ )  $\delta$  12.21 (s, 1H), 11.26 (s, 1H), 8.69 (d,  $J = 5.8$  Hz, 2H), 8.67 (s, 1H), 8.08 (d,  $J = 8.2$  Hz, 2H), 7.99 (d,  $J = 8.2$  Hz, 2H), 7.80 (d,  $J = 5.8$  Hz, 2H), 7.57 (d,  $J = 7.2$  Hz, 1H), 7.31 (t,  $J = 7.6$  Hz, 1H), 6.95–6.88 (m, 2H).  $^{13}\text{C}$  NMR (100 MHz,  $\text{DMSO}-d_6$ )  $\delta$  162.6, 157.9, 150.8, 148.8, 146.4, 140.8, 133.6, 131.9, 129.9, 129.0, 127.5, 121.8, 119.8, 119.1, 116.9. HR-MS (ESI) calcd. for  $\text{C}_{19}\text{H}_{16}\text{N}_3\text{O}_2$   $[\text{M}+1]^+$   $m/z$  318.1243, found 318.1247.

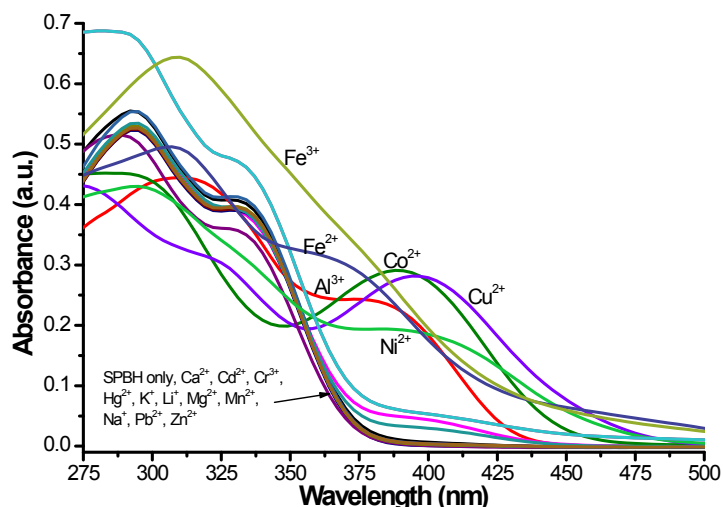

**Fig. S1** UV-vis spectra of **SPBH** (25  $\mu\text{M}$ ) upon the addition of 75  $\mu\text{M}$  of the respective metal ions ( $\text{Ag}^+$ ,  $\text{Al}^{3+}$ ,  $\text{Ca}^{2+}$ ,  $\text{Cd}^{2+}$ ,  $\text{Co}^{2+}$ ,  $\text{Cr}^{3+}$ ,  $\text{Cu}^{2+}$ ,  $\text{Hg}^{2+}$ ,  $\text{K}^+$ ,  $\text{Li}^+$ ,  $\text{Mg}^{2+}$ ,  $\text{Mn}^{2+}$ ,  $\text{Na}^+$ ,  $\text{Ni}^{2+}$ ,  $\text{Pb}^{2+}$ ,  $\text{Zn}^{2+}$ ,  $\text{Fe}^{2+}$ ,  $\text{Fe}^{3+}$ ) in  $\text{DMF}/\text{H}_2\text{O}$  (1:1).

#### Determination of binding constant from Fluorescence titration data:

Binding constant was calculated according to the Benesi-Hildebrand equation.  $K_a$  was calculated following the equation stated below.

$$1/(F - F_0) = 1/\{K_a(F_{\text{max}} - F_0)[M^{n+}]\} + 1/[F_{\text{max}} - F_0]$$

$F_0$  represents the emission enhancement of **SPBH** at 480 nm in the absence of  $\text{Al}^{3+}$ ,  $F_x$  is the emission intensity of **SPBH** in the presence of a particular concentration of  $\text{Al}^{3+}$ ,  $F_{\text{max}}$  is the emission intensity of **SPBH** at final (maximum) concentration of  $\text{Al}^{3+}$ .  $K_a$  is the binding constant of **SPBH**/ $\text{Al}^{3+}$  interaction and  $[M^{n+}]$  is the concentration of  $\text{Al}^{3+}$ . Plot of  $(F_{\text{max}} - F_x)/(F_x - F_0)$  vs  $1/[\text{Al}^{3+}]$  gives a straight line indicating 1:1 complexation between **SPBH** and  $\text{Al}^{3+}$ .

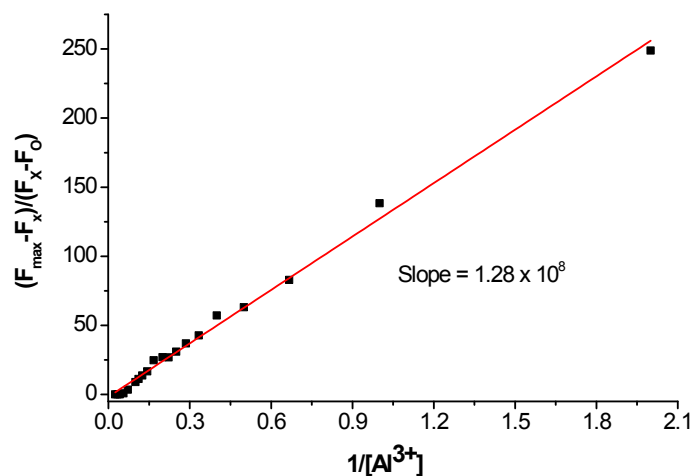

**Fig. S2** Determination of association constant of **SPBH** for  $\text{Al}^{3+}$  from fluorescent titration data

### Calculation of the limit of detection (LOD)

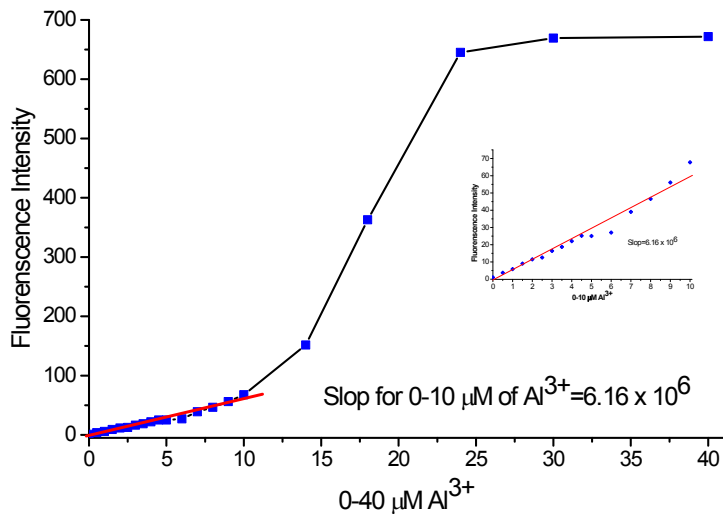

**Fig. S3** Plot of emission intensity of titration of **SPBH** (10 μM) upon the addition of Al<sup>3+</sup> (0–40 μM) in DMF/H<sub>2</sub>O (1:1), λ<sub>ex</sub> = 390 nm. Due to the instrumental figure of merit, slope value for 0–10 μM of Al<sup>3+</sup> (6.16 × 10<sup>6</sup>) was used for calculation of the detection limit (LOD).

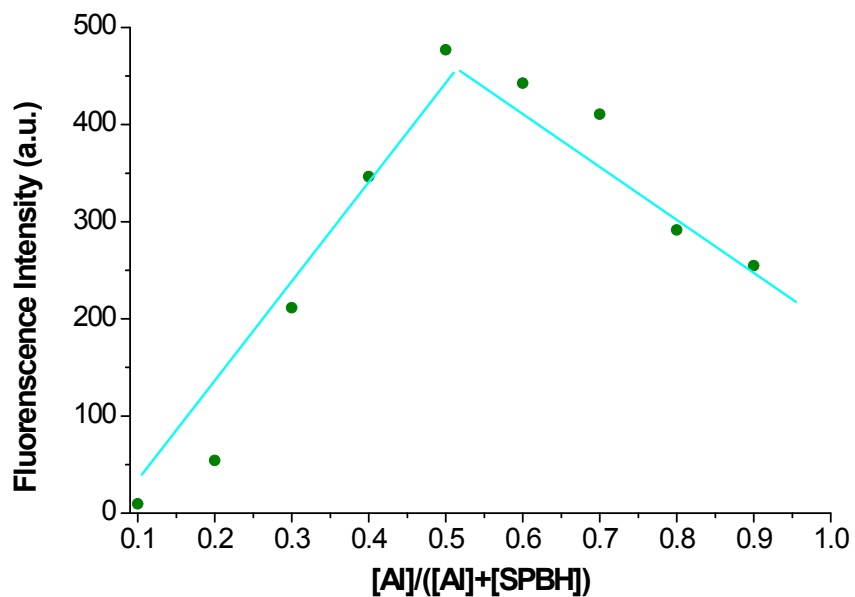

**Fig. S4** Job's plot of **SPBH**/Al<sup>3+</sup> interaction, changes in emission intensities were measured at 480 nm, λ<sub>ex</sub> = 380 nm.

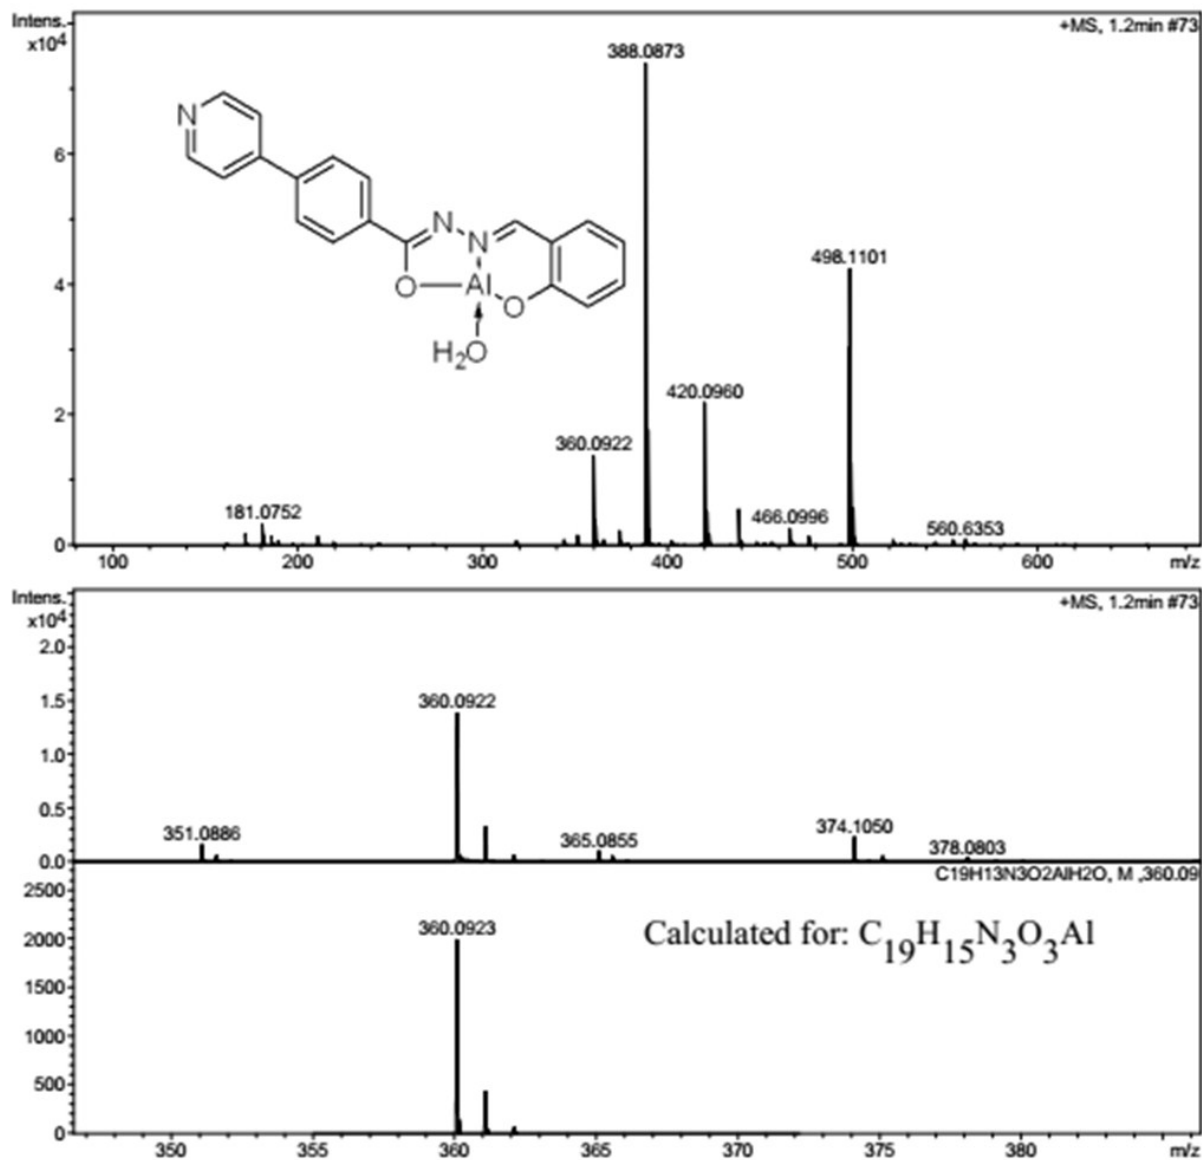

**Fig. S5** HRMS-ESI spectrum of **SPBH** in the presence of 3 equivalents of  $Al^{3+}$  in DMF/ $H_2O$  (1:1). Expanding peak at m/z 360.0922.

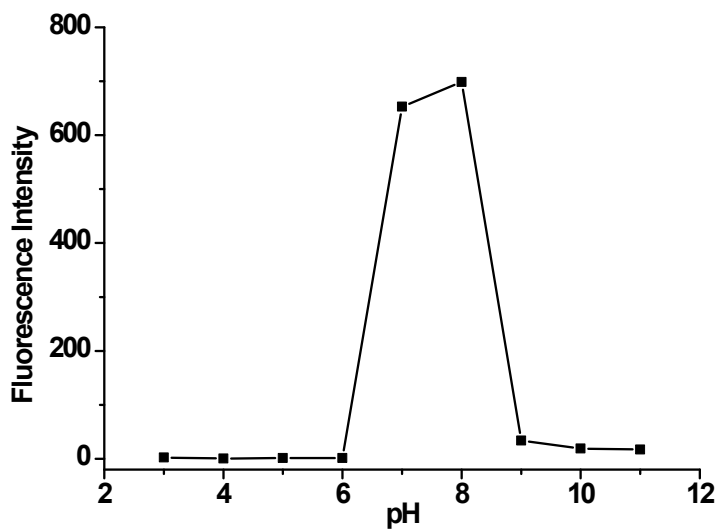

**Fig. S6** Fluorescence intensity plot (at 480 nm) of 10  $\mu\text{M}$  of **SPBH** and 30  $\mu\text{M}$  of  $\text{Al}^{3+}$  in DMF/ $\text{H}_2\text{O}$  (1:1, v/v) mixture at different pH,  $\lambda_{\text{ex}} = 380 \text{ nm}$ .

**Calculation of the limit of detection (LOD)**

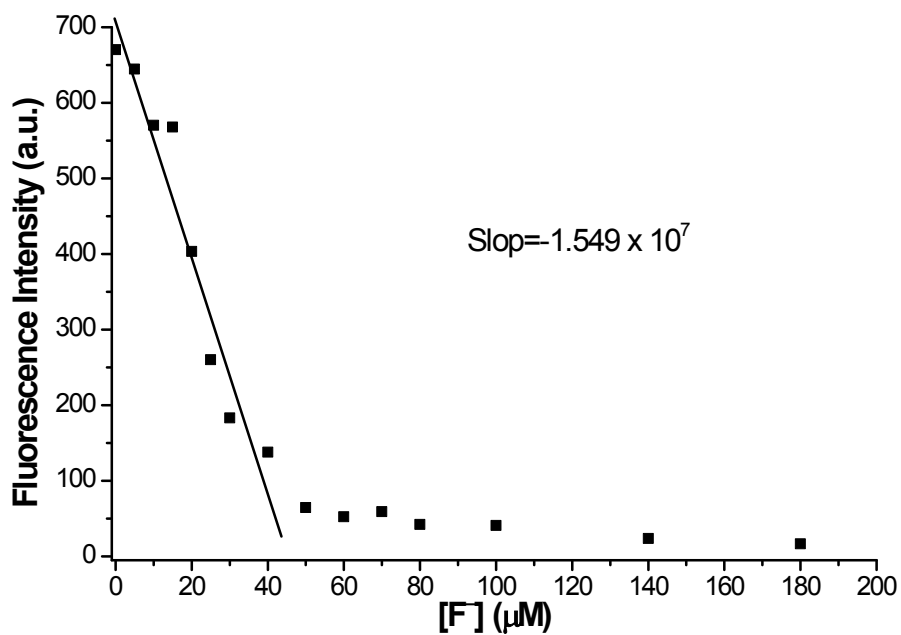

**Fig. S7** Plot of emission intensity of titration of complex of **SPBH** (10  $\mu\text{M}$ ) and  $\text{Al}^{3+}$  (30  $\mu\text{M}$ ) upon the addition of  $\text{F}^-$  (0–180  $\mu\text{M}$ ) in DMF/ $\text{H}_2\text{O}$  (1:1),  $\lambda_{\text{ex}} = 390 \text{ nm}$ . Slope value for 0–50  $\mu\text{M}$  of  $\text{F}^- = -1.549 \times 10^7$ . Thus using the formula we get the LOD =  $1.47 \times 10^{-6} \text{ M}$ .

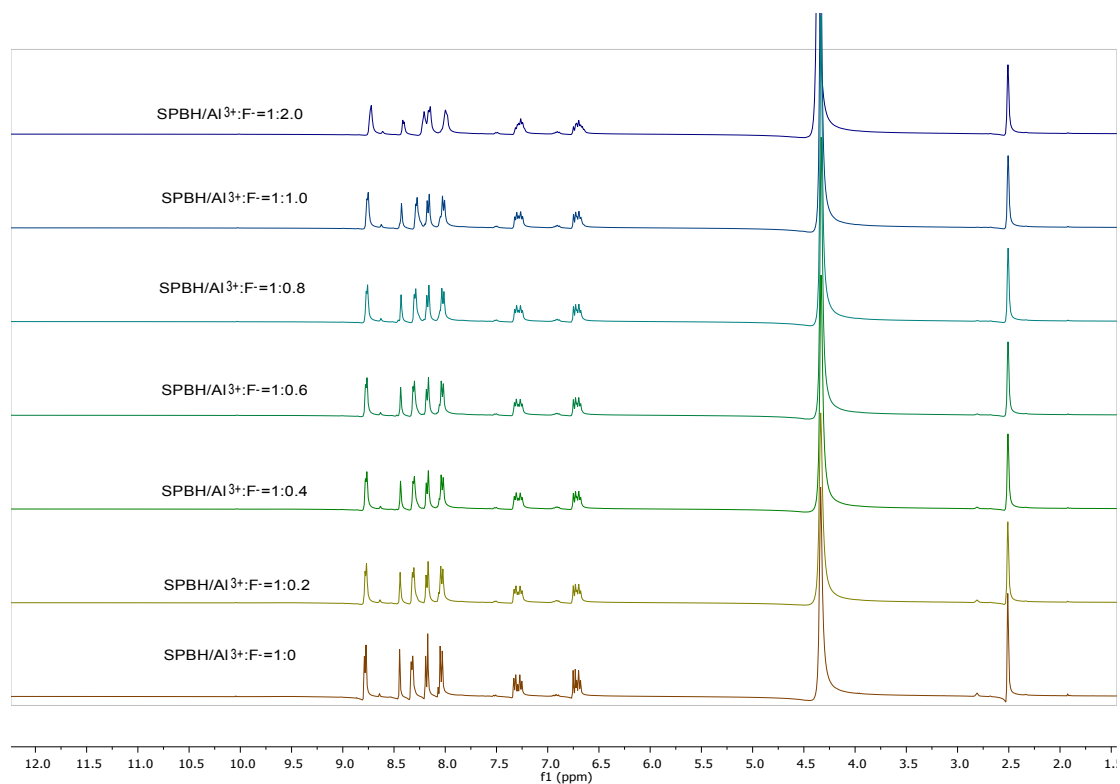

**Fig. S8**  $^1\text{H}$  NMR Spectra of  $\text{SPBH}/\text{Al}^{3+}$  complex (bottom) and titration studies with 0-1.2 eq. of  $\text{F}^-(\text{KF})$  in  $\text{DMSO}-d_6$ .

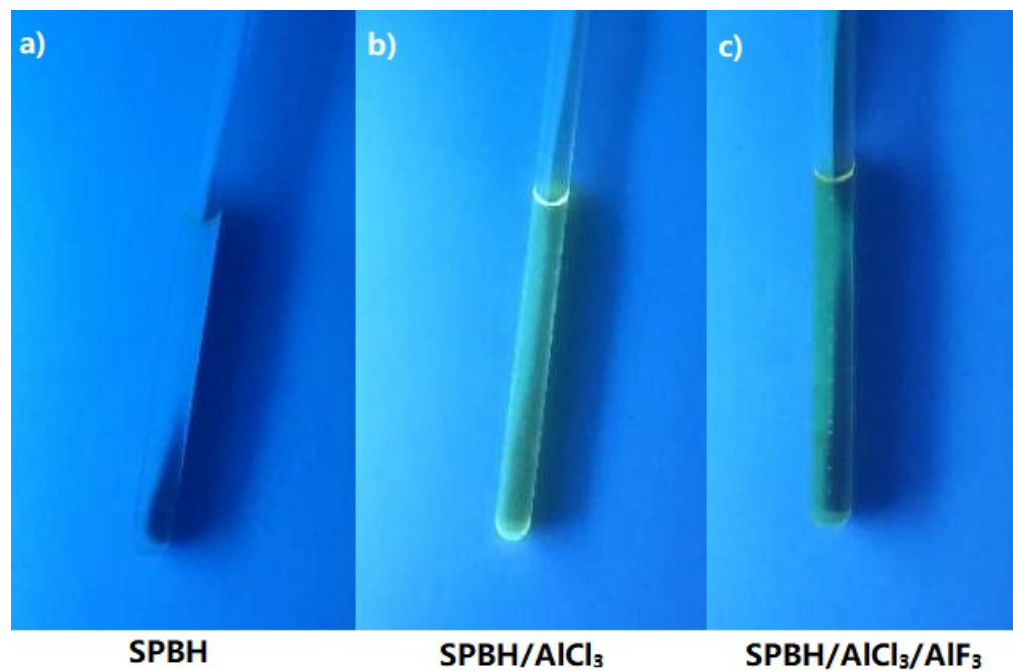

**Fig. S9** Naked eyes color response of a) **SPBH** (0.5 mM), b) **SPBH/ $\text{Al}^{3+}$**  (1:3) and c) the mixture of sensor and  $\text{F}^-$  (1:3:3) under 365 nm UV light.

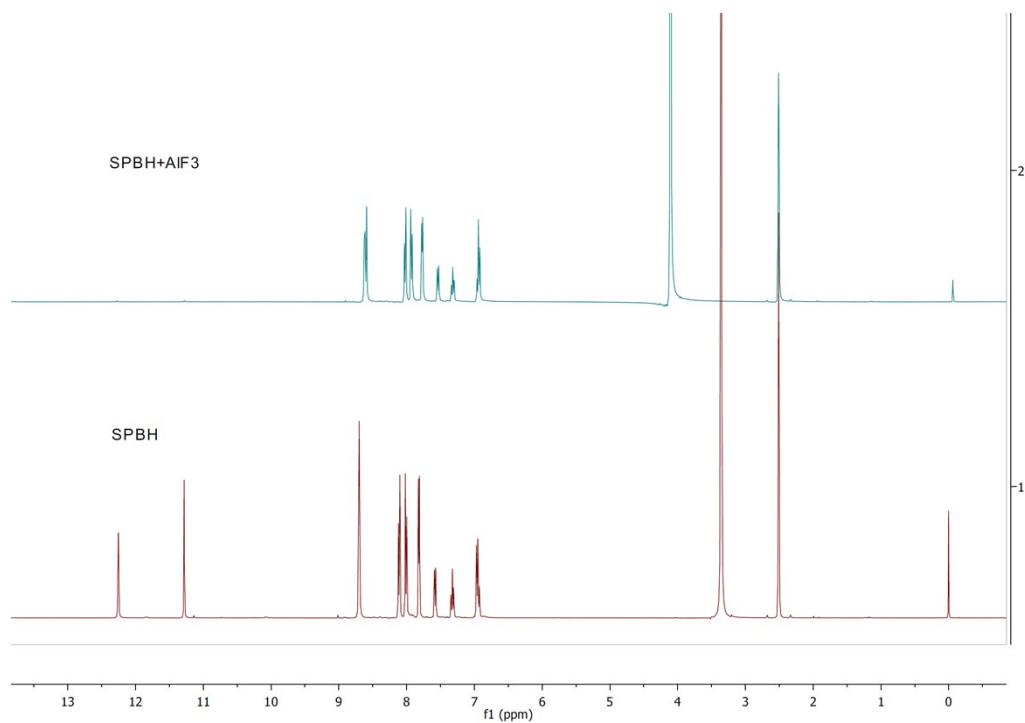

**Fig. S10** <sup>1</sup>H NMR Spectra of 1 mM of **SPBH** (bottom) and **SPBH/AlF<sub>3</sub>** (1:1) in DMSO-*d*<sub>6</sub>.

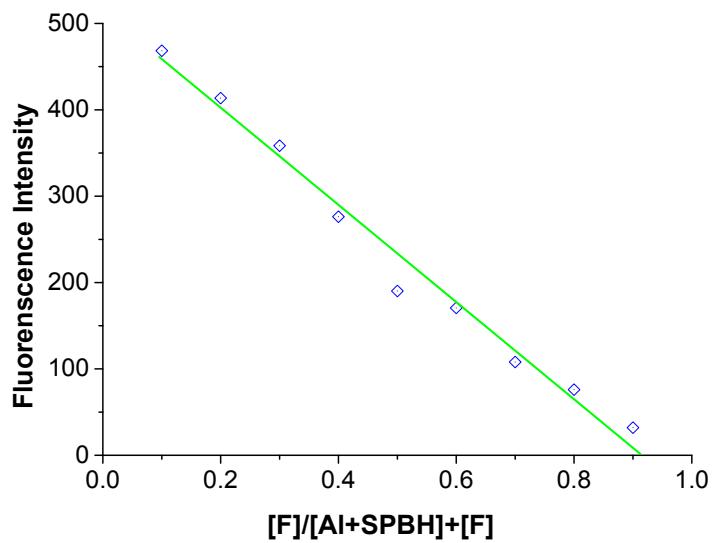

**Fig. S11** Job's plot of **SPBH/Al<sup>3+</sup>** with F<sup>-</sup> interaction, changes in emission intensities were measured at 480 nm,  $\lambda_{\text{ex}} = 380$  nm (ex slit=10 nm; em slit =5 nm).

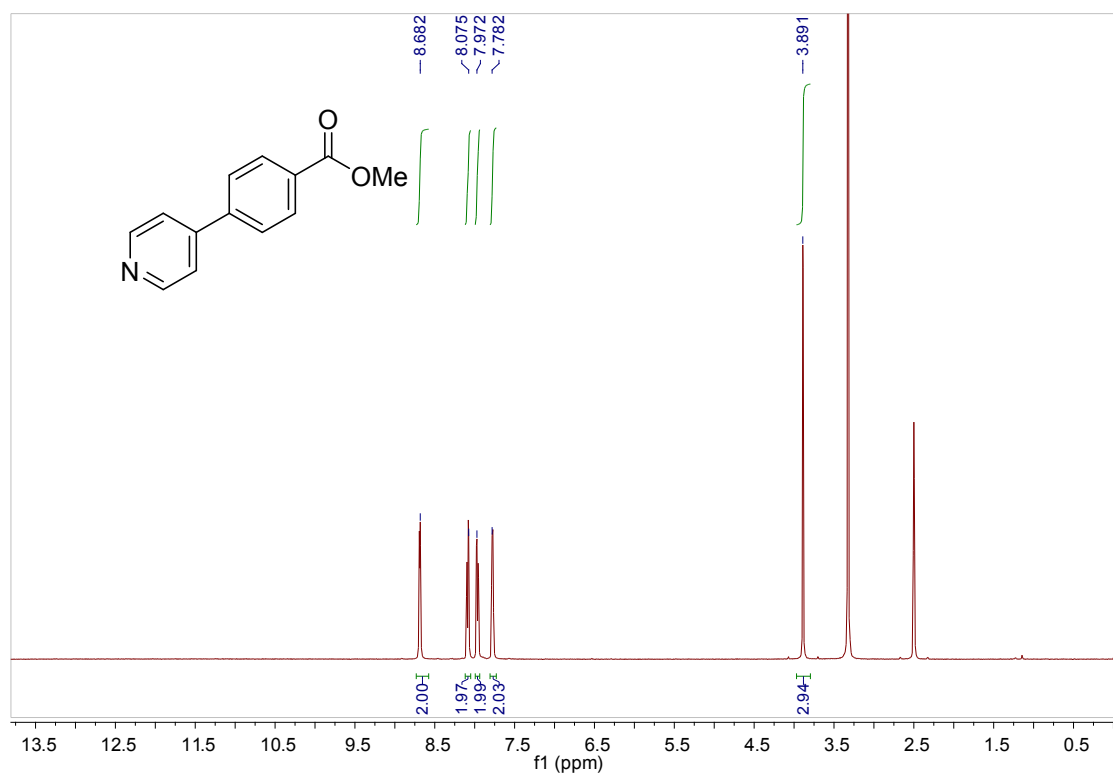

Fig. S12  $^1\text{H}$  NMR spectrum of methyl 4-(pyridin-4-yl)benzoate in  $\text{DMSO-}d_6$  at room temperature

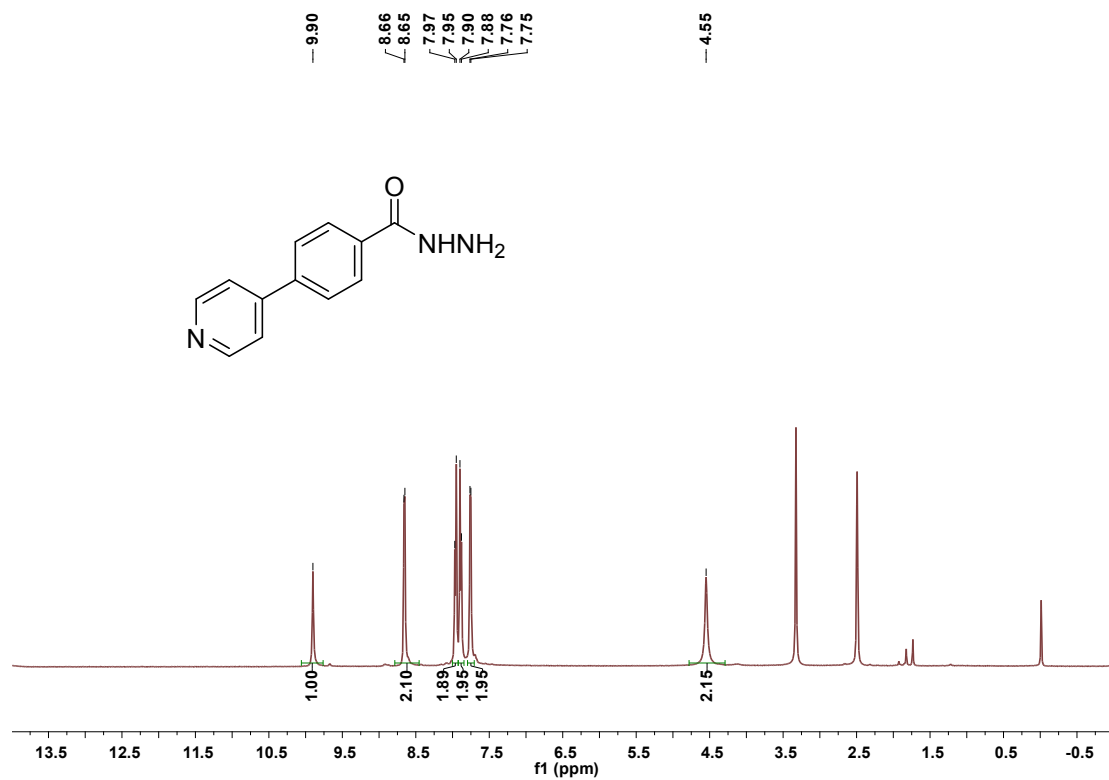



Fig. S13  $^1\text{H}$  NMR spectrum of 4-(pyridin-4-yl)benzohydrazide in  $\text{DMSO-}d_6$  at room temperature

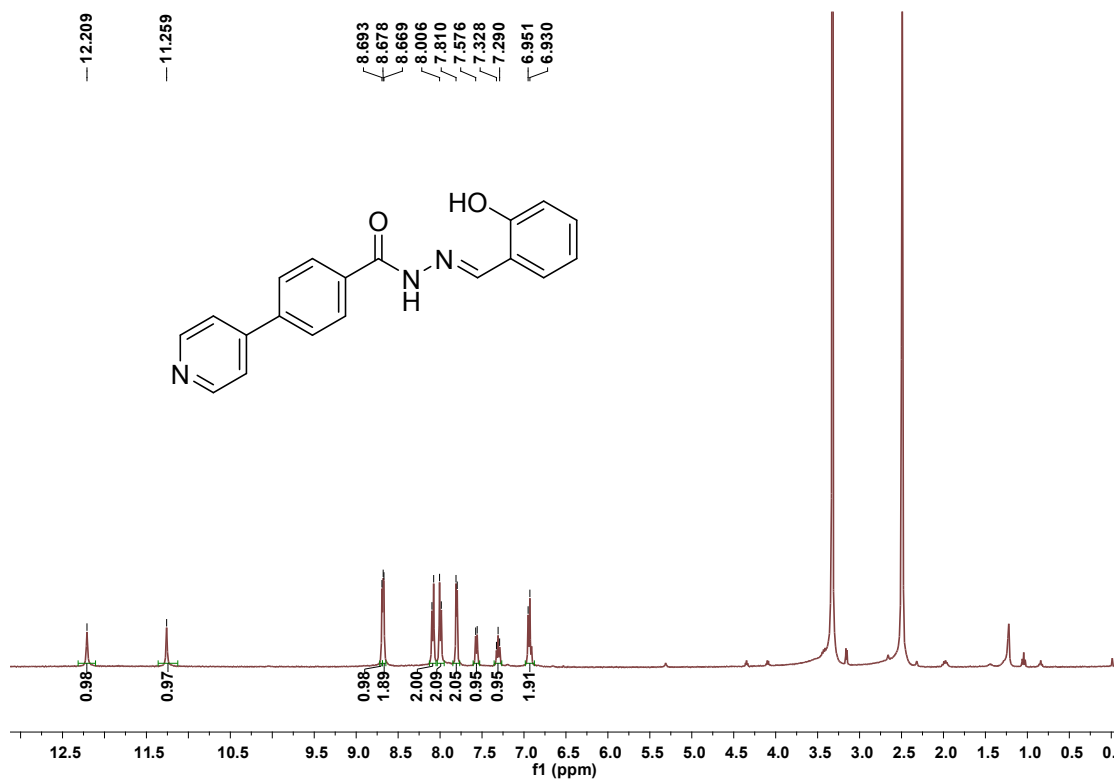

Fig. S14  $^1\text{H}$  NMR spectrum of SPBH in  $\text{DMSO-}d_6$  at room temperature

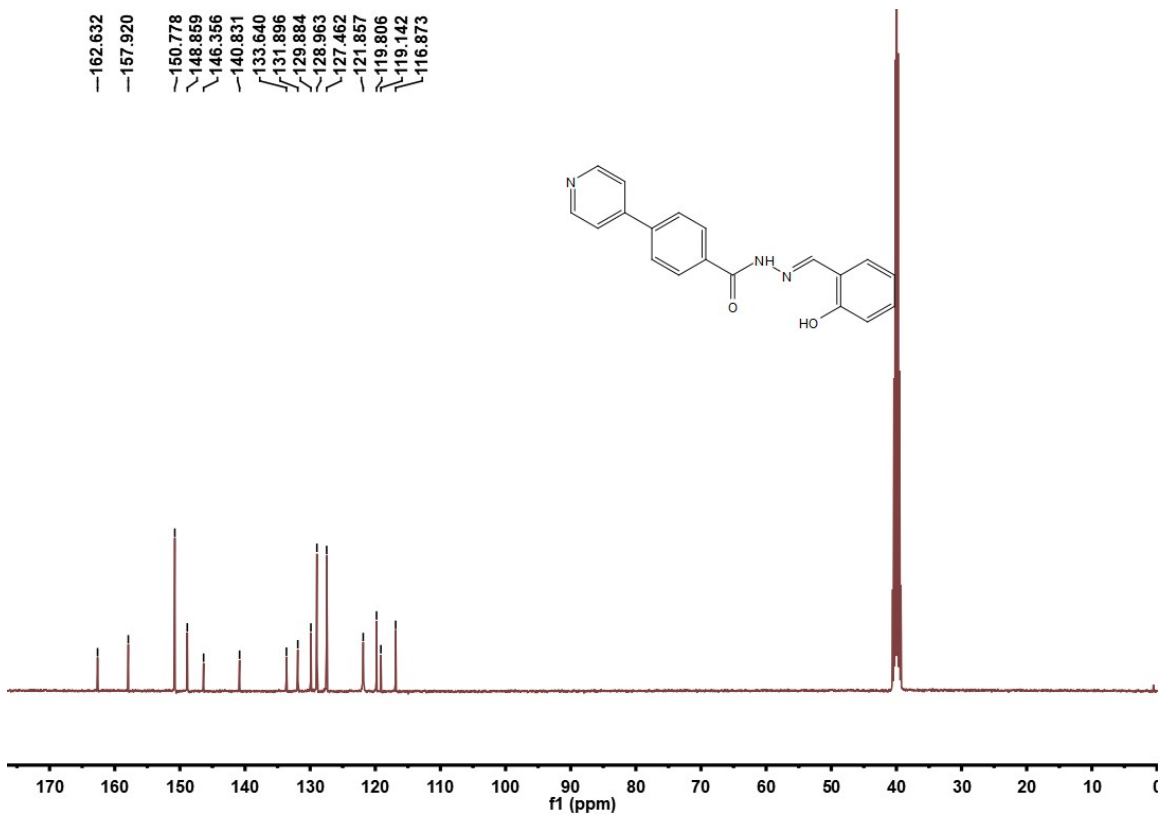

**Fig. S15**  $^{13}\text{C}$  NMR spectrum of **SPBH** in  $\text{DMSO-}d_6$  at room temperature.

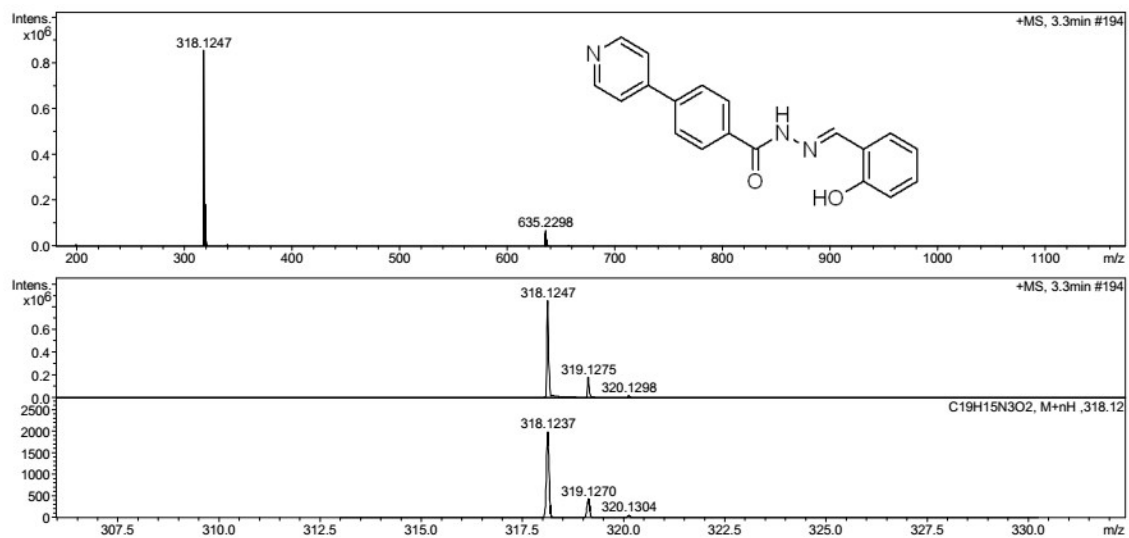

**Fig. S16** HRMS-ESI spectrum of **SPBH**
